# Supplementary material
Source: Royal Society of Chemistry journal article supplement (doi:10.1039/d5tc04351d)
Supplement: d5tc04351d1.pdf [file d5tc04351d1.pdf]

## Supporting Information

### **Exploring Lateral and Vertical Phase Separation in SEBS and Dibenzochrysene Derivatives Polymer Blends**

Jiayi Chen,<sup>1‡</sup> Piumi Kulatunga,<sup>2‡</sup> Félix Gagnon,<sup>3</sup> Surya Gayathri Bhattathiripad,<sup>2</sup> Jean-François Morin,<sup>3\*</sup> Simon Rondeau-Gagné,<sup>2\*</sup> Audrey Laventure<sup>1\*</sup>

<sup>1</sup> Département de Chimie, Université de Montréal, 1375 Avenue Thérèse-Lavoie-Roux, Montréal, QC, Canada, H2V 0B3

<sup>2</sup> Department of Chemistry and Biochemistry, University of Windsor, 401 Sunset Avenue, Windsor, ON, Canada, N9B 3P4

<sup>3</sup> Département de Chimie, Université Laval, 1045 Avenue de la Médecine, Québec, QC, Canada, G1V0A6

#### **Table of contents**

|                                         |           |
|-----------------------------------------|-----------|
| <b>Molecular Characterization.....</b>  | <b>S2</b> |
| <b>Thermal Characterization.....</b>    | <b>S3</b> |
| <b>Optical Characterization.....</b>    | <b>S3</b> |
| <b>Microstructure Analyses.....</b>     | <b>S4</b> |
| <b>QNM Analyses.....</b>                | <b>S6</b> |
| <b>Electronic Characterization.....</b> | <b>S7</b> |

## Molecular characterization

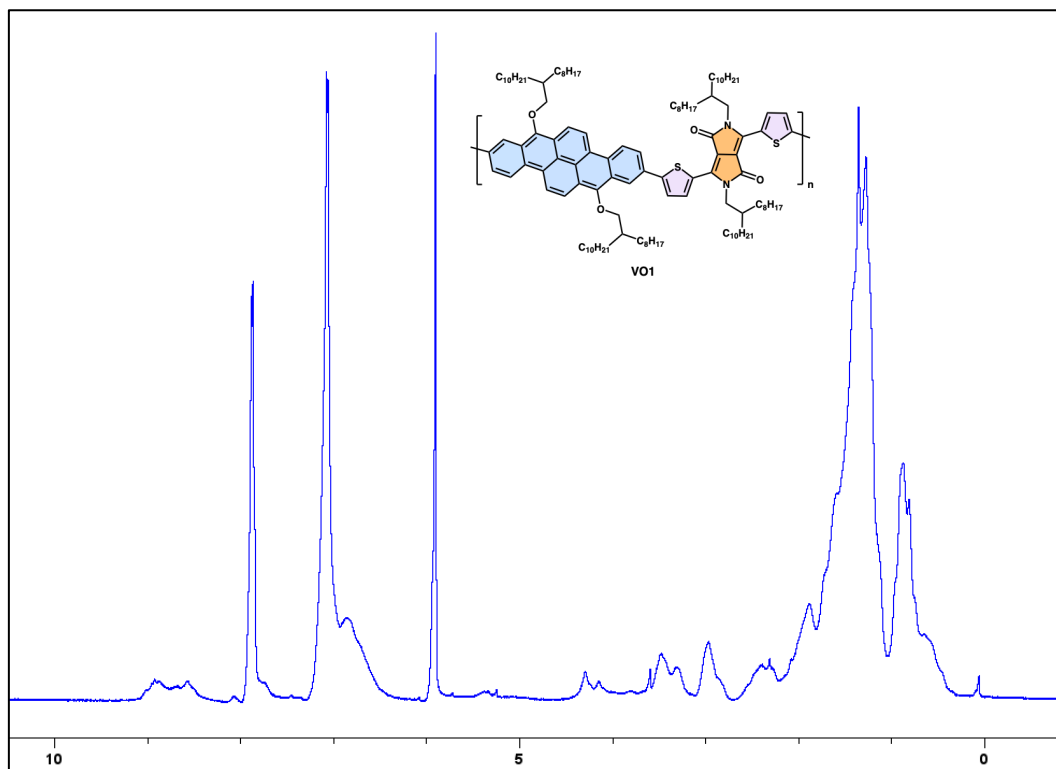

**Figure S1.**  $^1\text{H}$  NMR spectrum of VO1 polymer in 1,1,2,2-tetrachloroethane at 140°C.

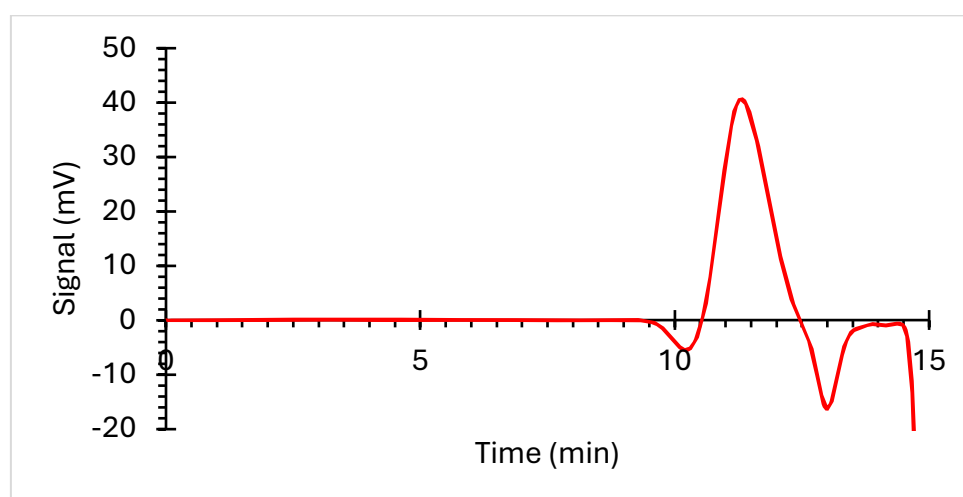

**Figure S2.** Size exclusion chromatography trace for VO1 polymer ( $M_n = 17.4 \text{ kg}\cdot\text{mol}^{-1}$ ,  $M_w = 26.2 \text{ kg}\cdot\text{mol}^{-1}$ , dispersity index ( $\mathcal{D}$ ) = 1.5,  $X_n = 10$ ).

## Thermal characterization

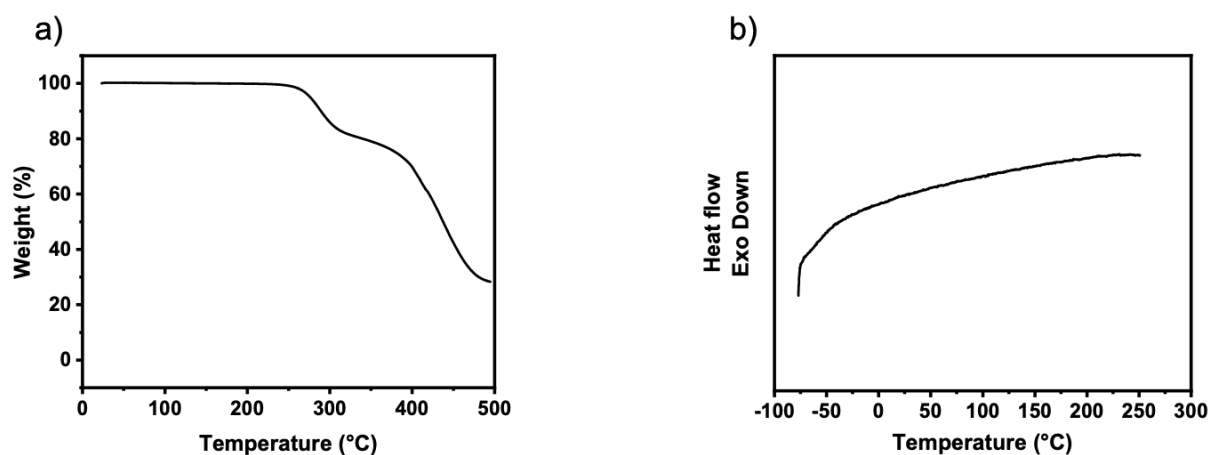

**Figure S3.** VO1 polymer thermal characterization a) TGA curve and b) DSC second heating curve. Both experiments are performed under nitrogen atmosphere and with a heating rate of 10 °C/min.

## Optical characterization

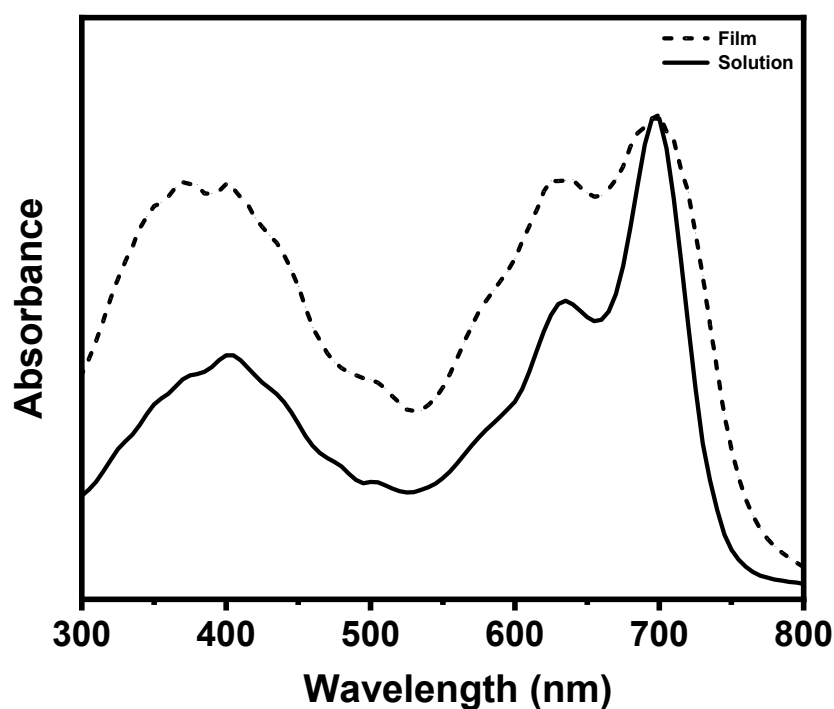

**Figure S4.** UV-visible spectra of a VO1 solution prepared in  $\text{CHCl}_3$  (full curve) and its drop-cast film from a  $\text{CHCl}_3$  solution (dashed curve). Transmission UV-vis measurements were performed using a Cary 60 spectrophotometer on both solutions and drop-cast films. In both cases, chloroform was used as the solvent and it was chosen to facilitate solvent evaporation during film formation.

## Microstructure analyses

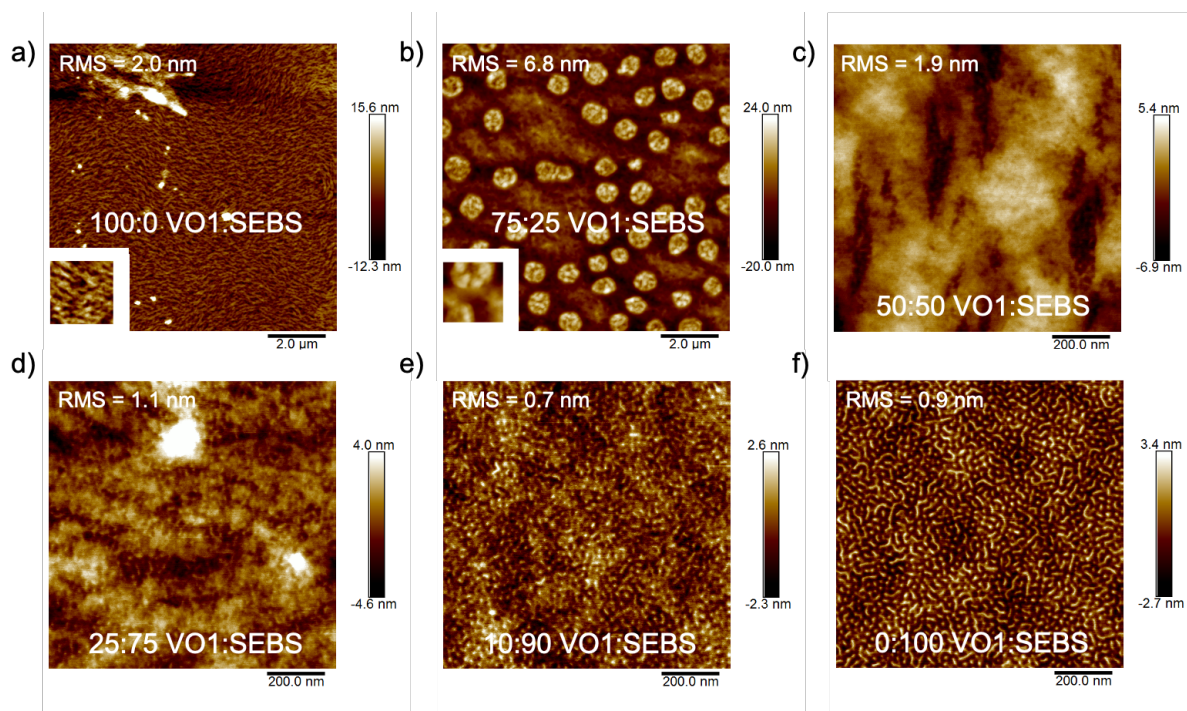

**Figure S5.** AFM height images of VO1:SEBS spin-coated films: a) 100:0 VO1:SEBS, b) 75:25 VO1:SEBS, c) 50:50 VO1:SEBS, d) 25:75 VO1:SEBS, e) 10:90 VO1:SEBS, f) 0:100 VO1:SEBS.

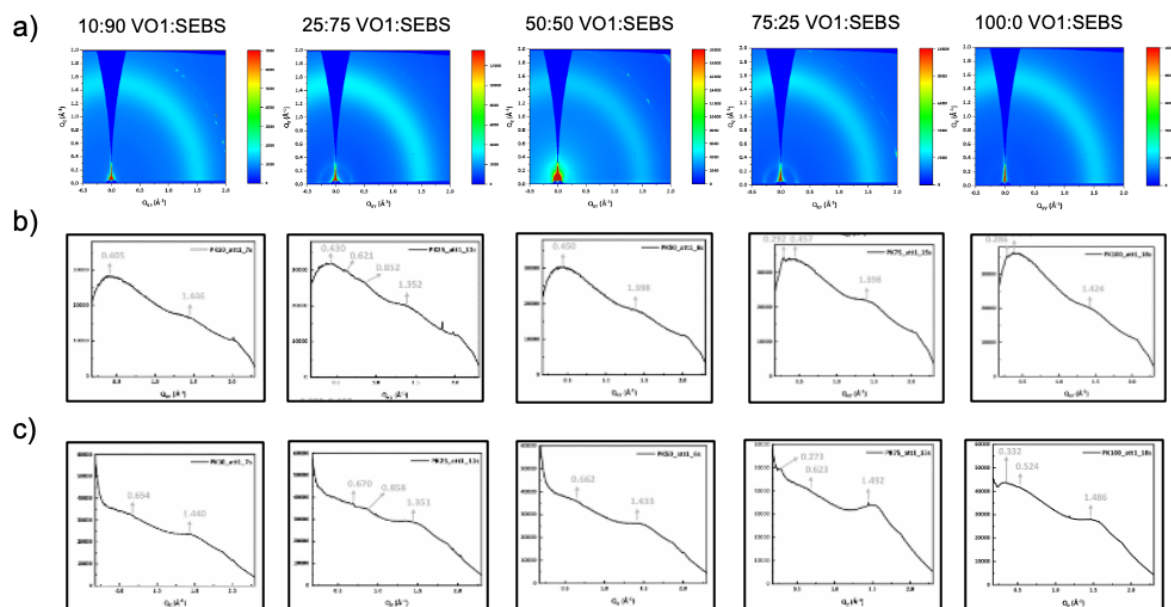

**Figure S6.** GIWAXS (a) 2D graphs, (b) 1D graphs  $q_{xy}$  direction, (c) 1D graphs  $q_z$  direction for VO1:SEBS polymer blends.

**Table S1.** *d* - spacing values in Z directions

| Sample         | Z Direction - q value ( $\text{\AA}^{-1}$ )/ d-spacing $2\pi/q$ ( $\text{\AA}$ ) |                     |                    |                    |
|----------------|----------------------------------------------------------------------------------|---------------------|--------------------|--------------------|
|                | $q_z^1$                                                                          | $q_z^2$             | $q_z^3$            | $q_z^4$            |
| 10:90 VO1:SEBS | -                                                                                | 0.654<br>d = 9.602  | -                  | 1.440<br>d = 4.361 |
| 25:75 VO1:SEBS | -                                                                                | 0.670<br>d = 9.373  | 0.858<br>d = 7.319 | 1.351<br>d = 4.648 |
| 50:50 VO1:SEBS | -                                                                                | 0.662<br>d = 9.486  | -                  | 1.433<br>d = 4.382 |
| 75:25 VO1:SEBS | 0.273<br>d = 23.004                                                              | 0.623<br>d = 10.080 | -                  | 1.492<br>d = 4.209 |
| 100:0 VO1:SEBS | 0.332<br>d = 18.916                                                              | 0.524<br>d = 11.985 | -                  | 1.486<br>d = 4.226 |

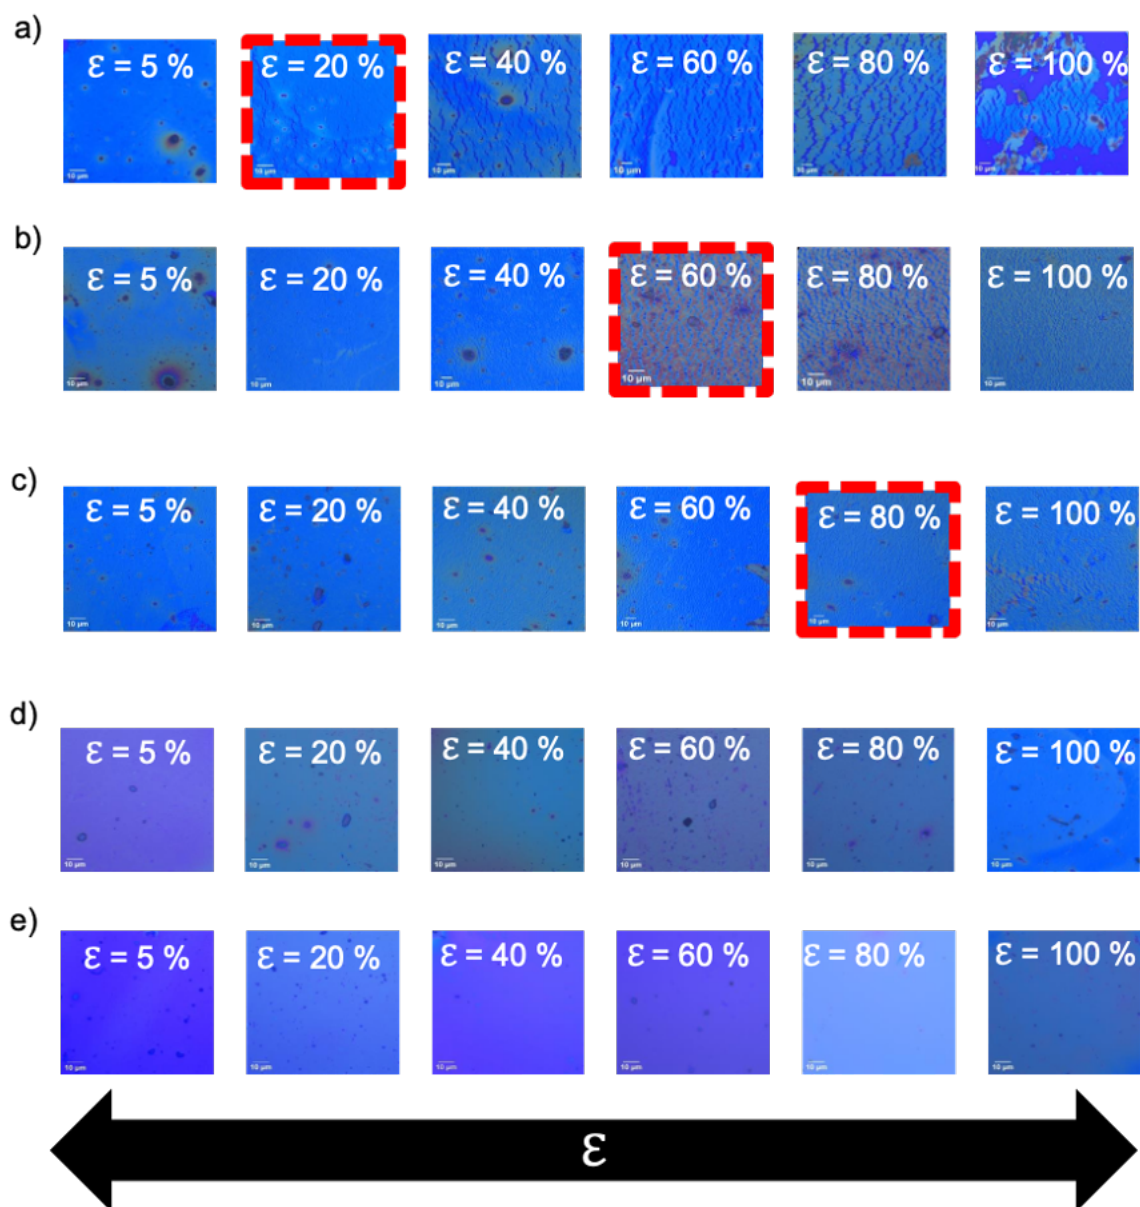

**Figure S7.** Optical images showing crack onset in the VO1:SEBS spin-coated films: a) 100:0 VO1:SEBS, b) 75:25 VO1:SEBS, c) 50:50 VO1:SEBS, d) 25:75 VO1:SEBS, e) 10:90 VO1:SEBS.

**Table S2.** Film thickness, surface roughness (RMS) and XPS final etching time of VO1:SEBS (H1052) spin-coated samples.

| Sample         | Thickness (nm) | RMS (nm) | XPS final etching time (s) |
|----------------|----------------|----------|----------------------------|
| 100:0 VO1:SEBS | 35             | 2.0      | ~ 250                      |
| 75:25 VO1:SEBS | 37             | 6.8      | ~ 250                      |
| 50:50 VO1:SEBS | 40             | 1.9      | ~ 275                      |
| 25:75 VO1:SEBS | 41             | 1.1      | ~ 290                      |
| 10:90 VO1:SEBS | 43             | 0.7      | ~ 310                      |
| 0:100 VO1:SEBS | 35             | 0.9      | ~ 310                      |

## Quantitative Nanomechanical Mapping (QNM) Characterization

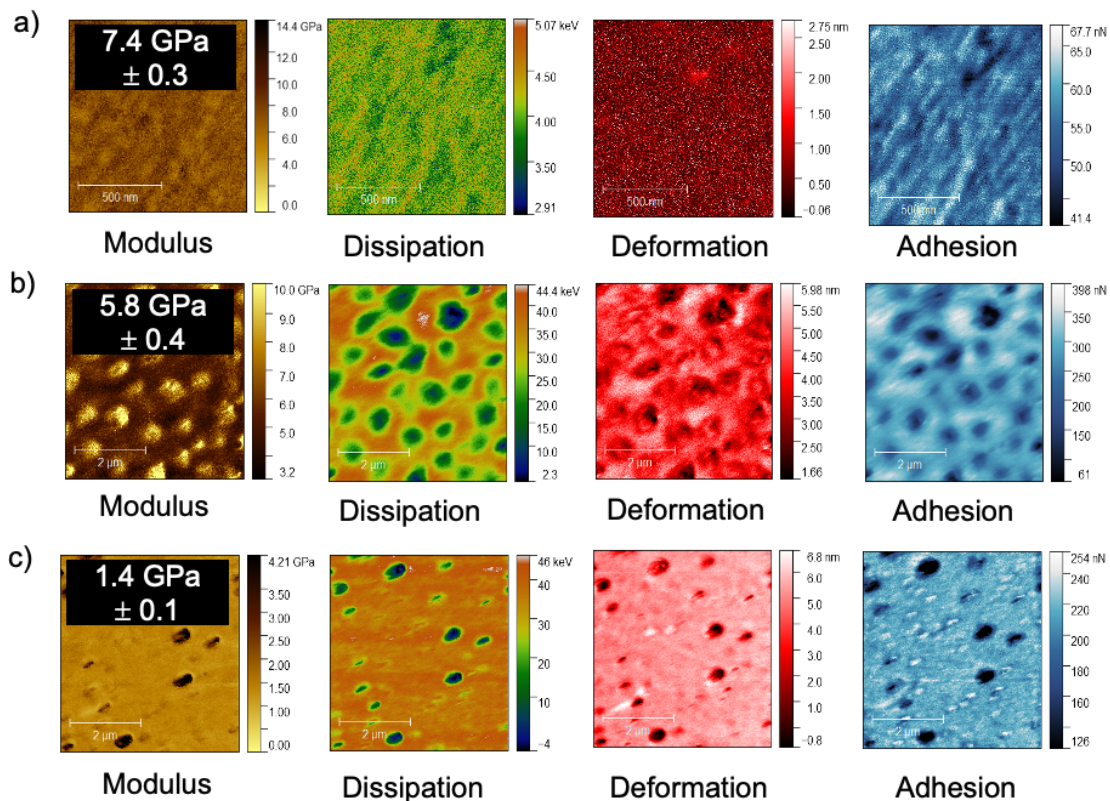

**Figure S8.** DMT modulus, dissipation, deformation and adhesion images via AFM for (a) 100:0 VO1:SEBS, (b) 50:50 VO1:SEBS and (c) 10:90 VO1:SEBS.

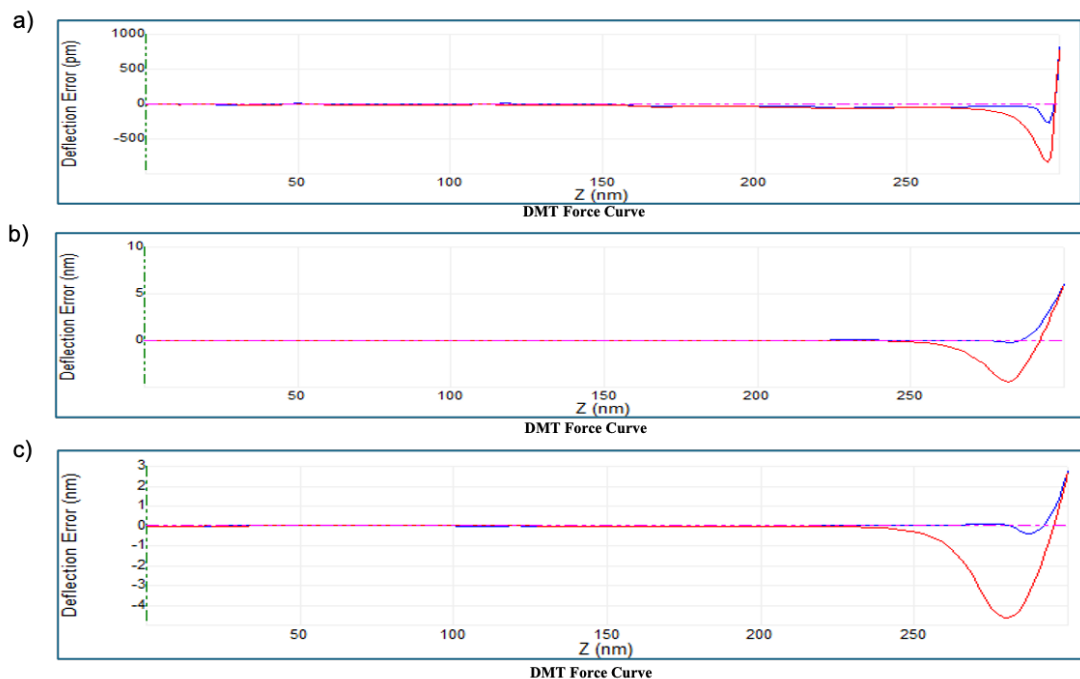

**Figure S9.** DMT modulus Force curves for a) 100:0 b) 50:50 and c) 10:90 VO1:SEBS blend.

# Electronic characterization

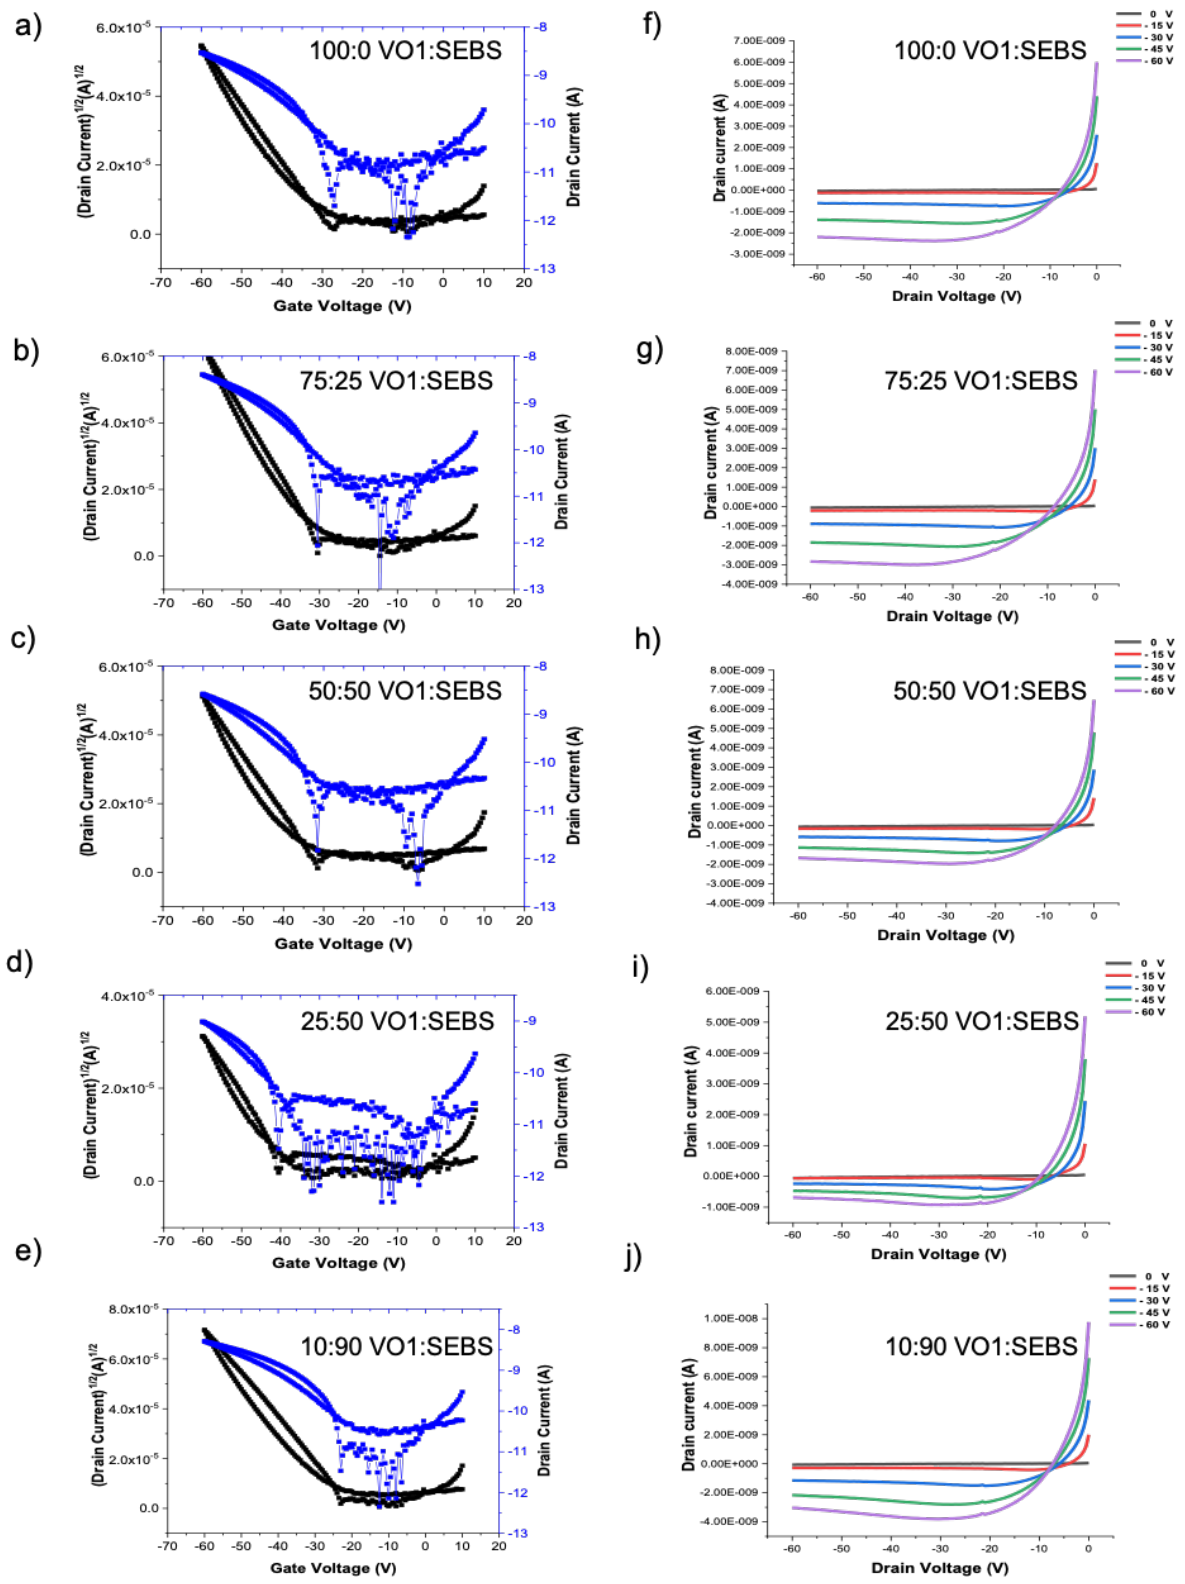

**Figure S10.** Transfer (a–e) and output (f–j) curves for OFET devices fabricated using 100:0 to 10:90 VO1:SEBS before thermal annealing ( $V_d = -60$  V).

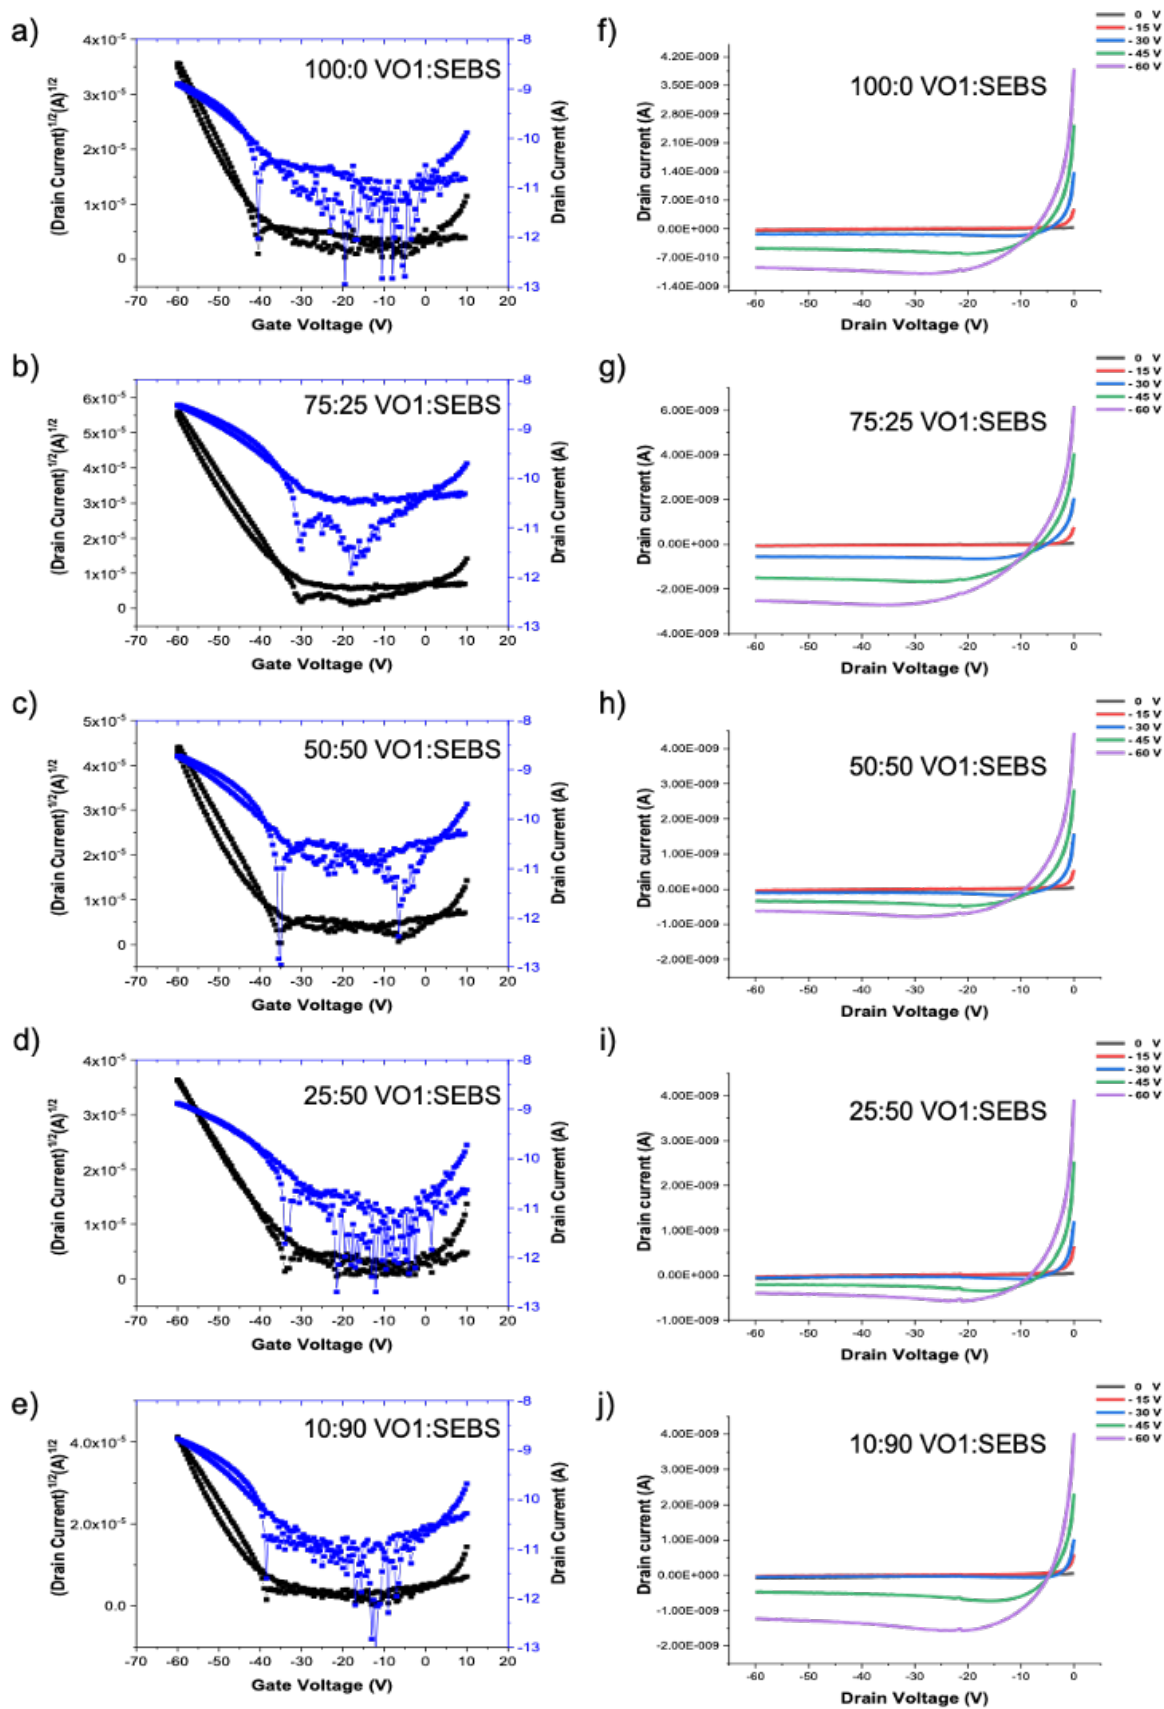

**Figure S11.** Transfer (a–e) and output (f–j) curves for OFET devices fabricated using 100:0 to 10:90 VO1:SEBS after thermal annealing ( $V_d = -60$  V).

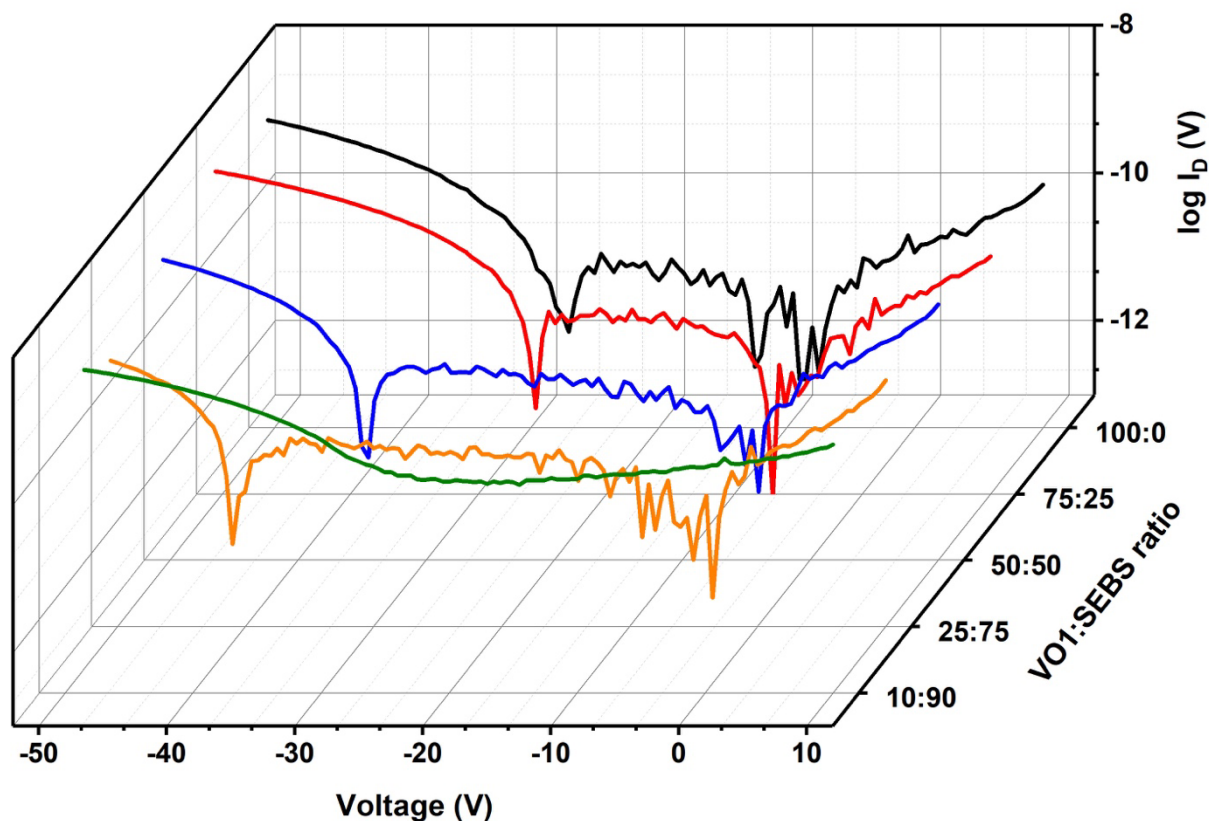

**Figure S12.** Transfer curves of different polymer blends (10:90 - 100:0 VO1:SEBS) before thermal annealing ( $V_{DS} = -60$  V).

**Table S3.** Average ( $\mu_h^{avg}$ ) and maximum hole mobilities ( $\mu_h^{max}$ ), threshold voltages ( $V_{th}$ ), and  $I_{on}/I_{off}$  ratios for OFETs fabricated using 25:75 VO1:SEBS blend, pre-stretched (0, 25 and 50% strain). The device performances were averaged from 5 devices and W/L represents width/length channel ratio.

| Stretched (%) | Stretching direction | W/L | $\mu_h^{avg}/\mu_h^{max}$ ( $\text{cm}^2 \text{V}^{-1} \text{s}^{-1}$ ) $\times 10^{-5}$ | $I_{on}/I_{off}$ | $V_{th}^{avg}$ (V) |
|---------------|----------------------|-----|------------------------------------------------------------------------------------------|------------------|--------------------|
| 0             | Parallel             | 10  | $5.3 \pm 1.1 / 6.4$                                                                      | $10^2$           | $-22.6 \pm 2.7$    |
|               | Perpendicular        |     | $4.6 \pm 0.7 / 5.5$                                                                      |                  | $-22.3 \pm 3.3$    |
| 25            | Parallel             | 10  | $1.6 \pm 0.7 / 2.4$                                                                      | $10^2$           | $-28.6 \pm 3.1$    |
|               | Perpendicular        |     | $2.5 \pm 0.6 / 3.1$                                                                      |                  | $-22.9 \pm 2.8$    |
| 50            | Parallel             | 10  | $1.9 \pm 0.6 / 2.6$                                                                      | $10^2$           | $-30.4 \pm 1.4$    |
|               | Perpendicular        |     | $2.7 \pm 1.0 / 3.9$                                                                      |                  | $-37.9 \pm 4.4$    |

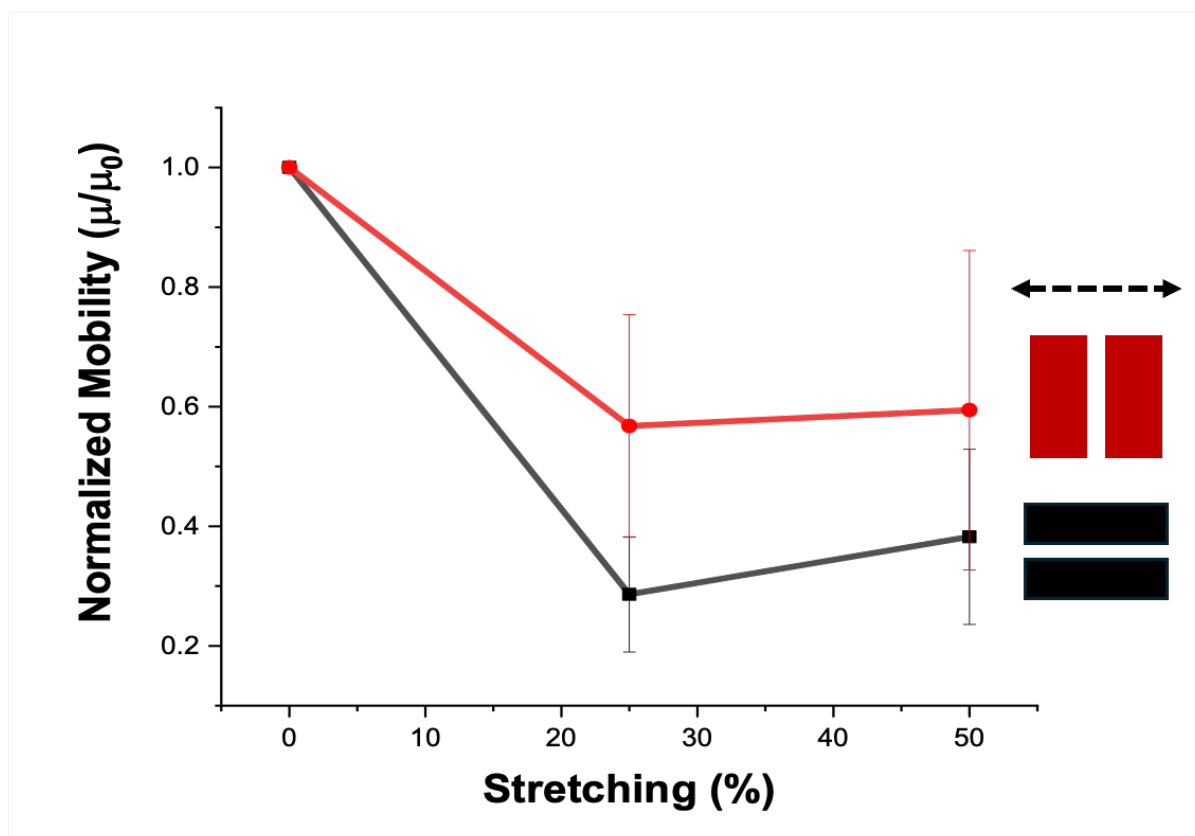

**Figure S13.** Charge mobility values of 25:75 VO1:SEBS blend stretched films, normalized by initial value at 0 % strain for charge transport oriented parallel and perpendicular to the strain direction.

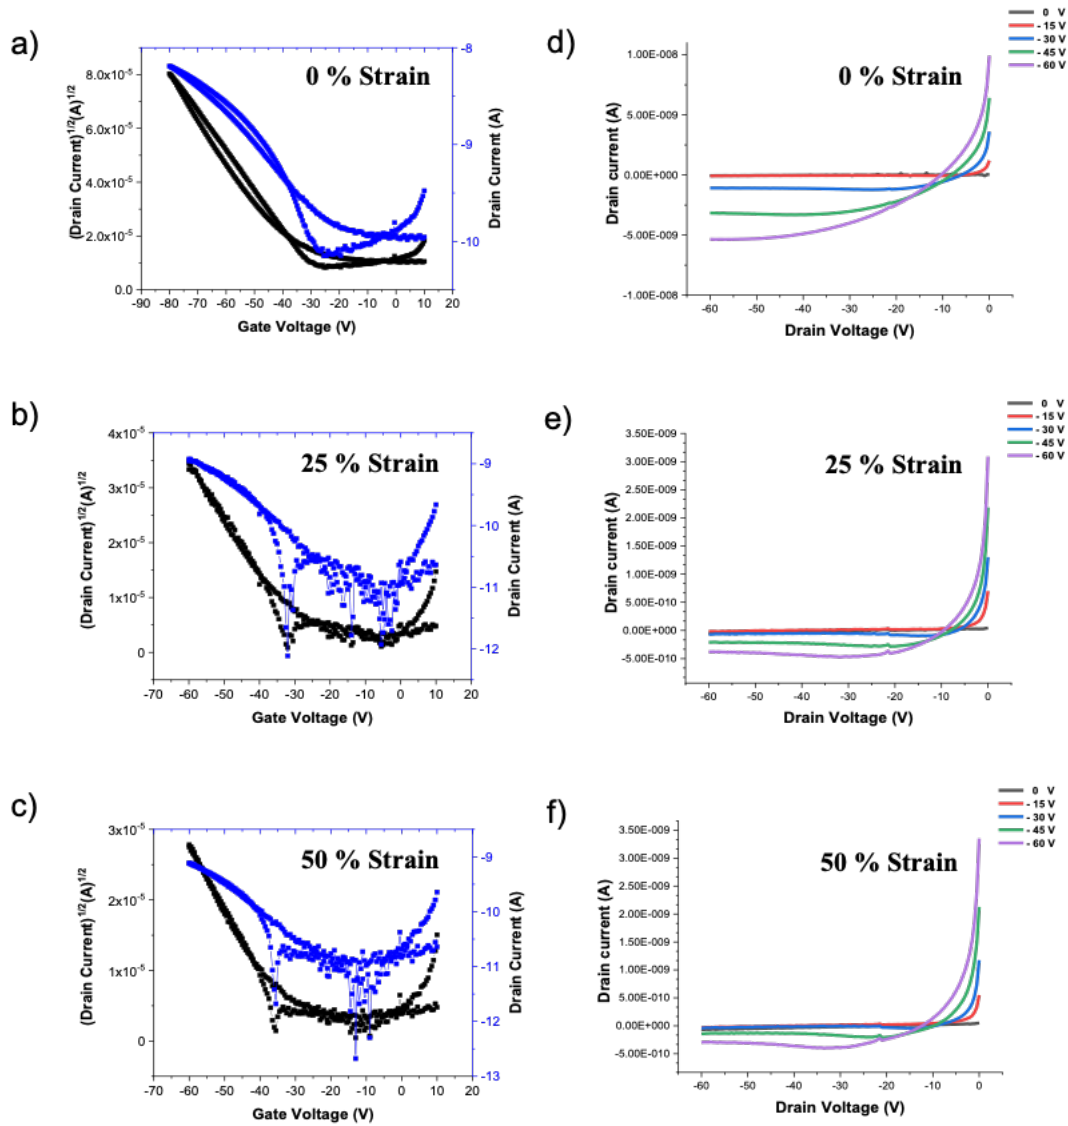

**Figure S14.** Transfer (a–c) and output (e–f) curves for OFET devices fabricated using transferred pre-stretched 25:75 VO1:SEBS polymer blend films on SiO<sub>2</sub> at different applied strains: strain is parallel to the charge transport. No annealing treatment was performed for these measurements and V<sub>d</sub> = -60V.

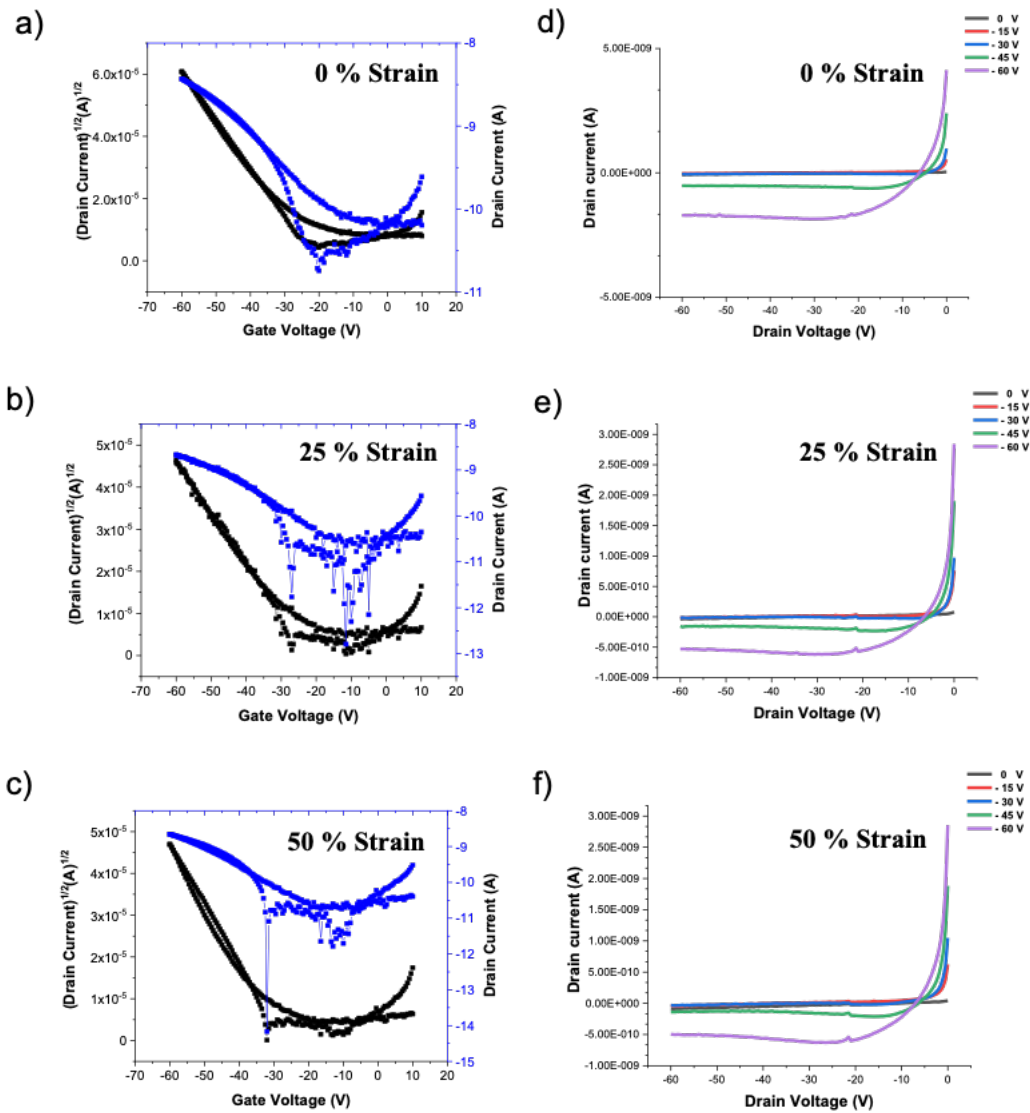

**Figure S15.** Transfer (a–c) and output (e–f) curves for OFET devices fabricated using transferred pre-stretched 25:75 VO1:SEBS polymer blend films on SiO<sub>2</sub> at different applied strains: strain is perpendicular to the charge transport. No annealing treatment was performed for these measurements and  $V_d = -60\text{V}$ .
